# Supplementary figures and images for: Synthesis of anisotropic PbS nanoparticles using heterocyclic dithiocarbamate complexes
Source: Royal Society of Chemistry journal article supplement (doi:10.1039/c2dt30282a), 2012-01-01

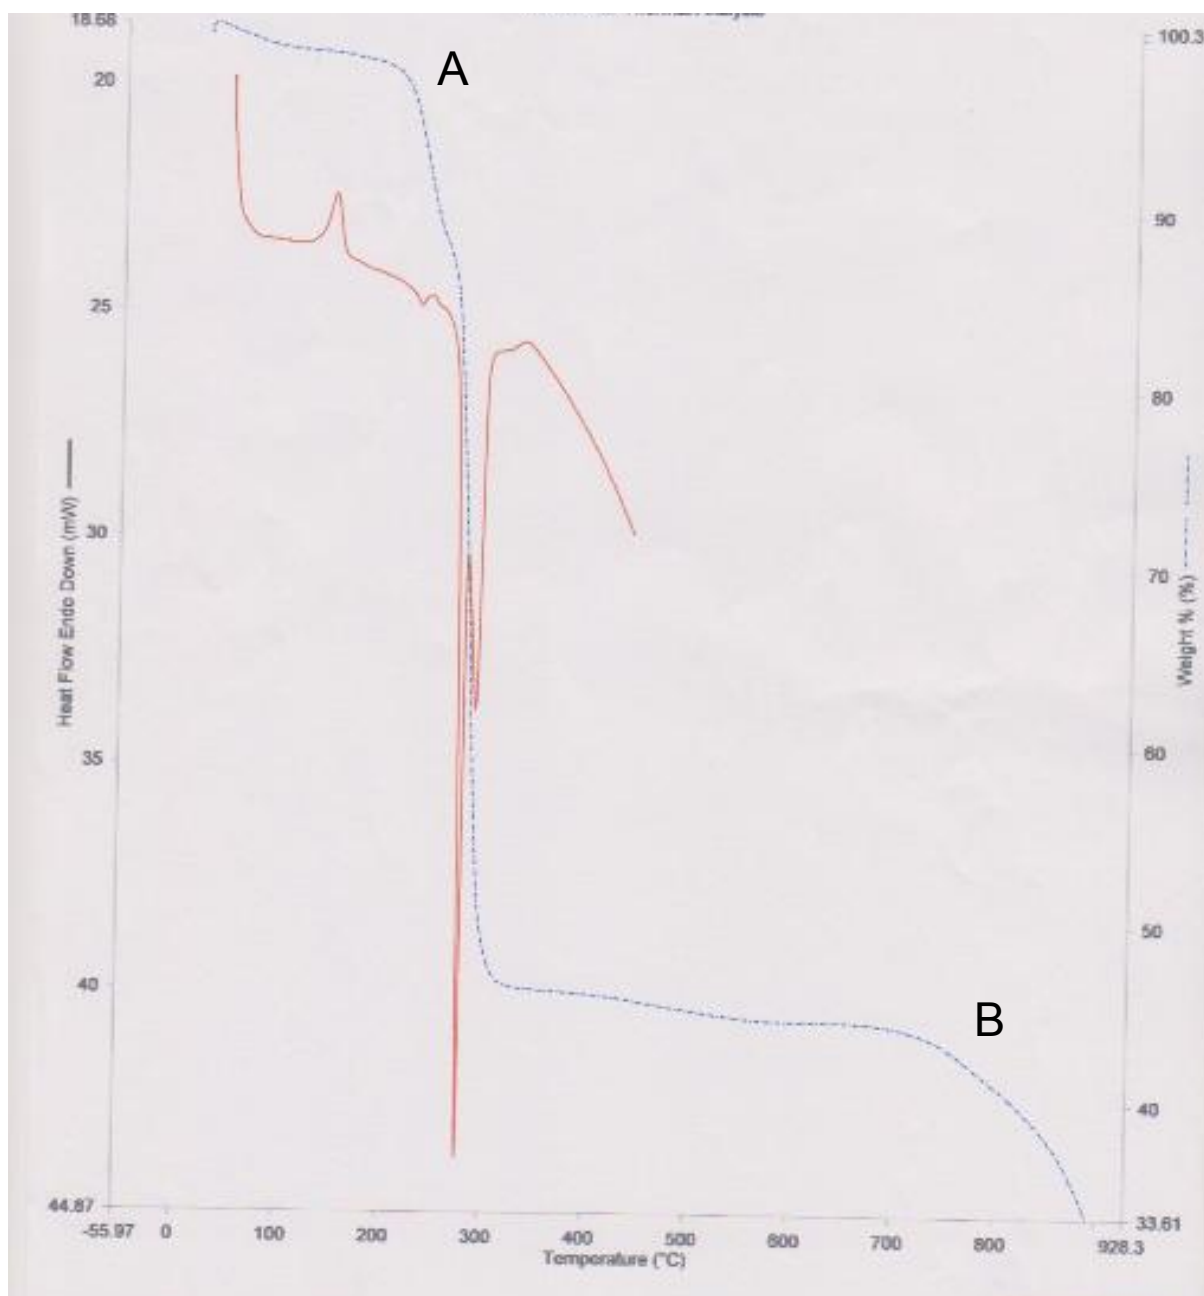

DSC and TGA thermogram of  $\text{Pb}(\text{thq-dtc})_2$

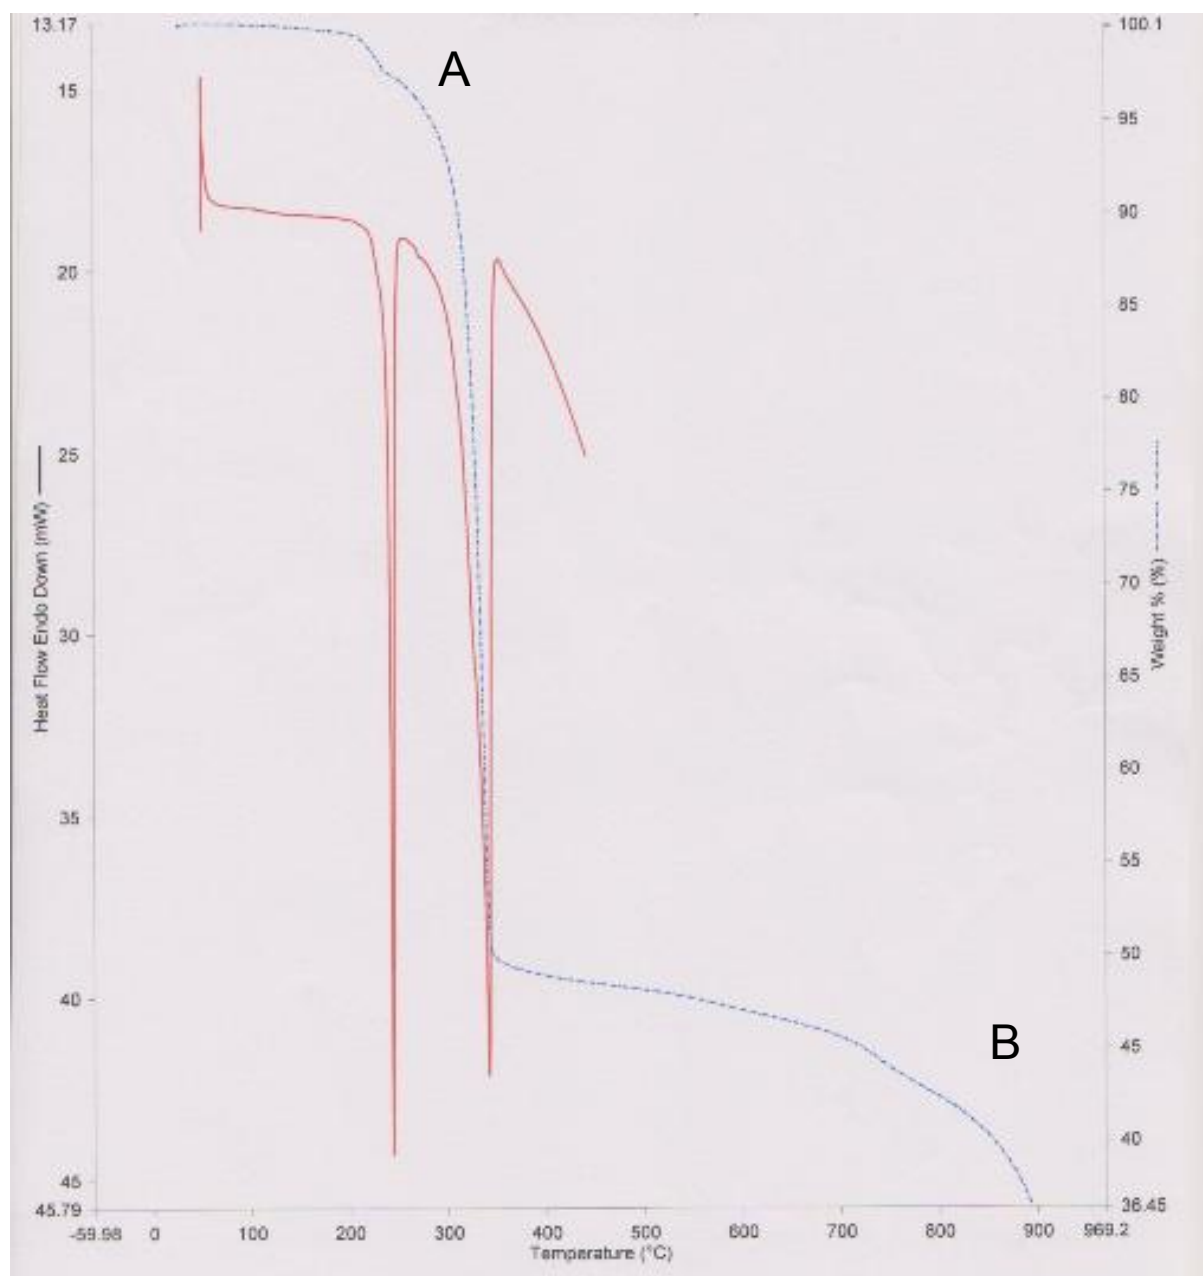

DSC and TGA thermogram of  $\text{Pb}(\text{pip-dtc})_2$

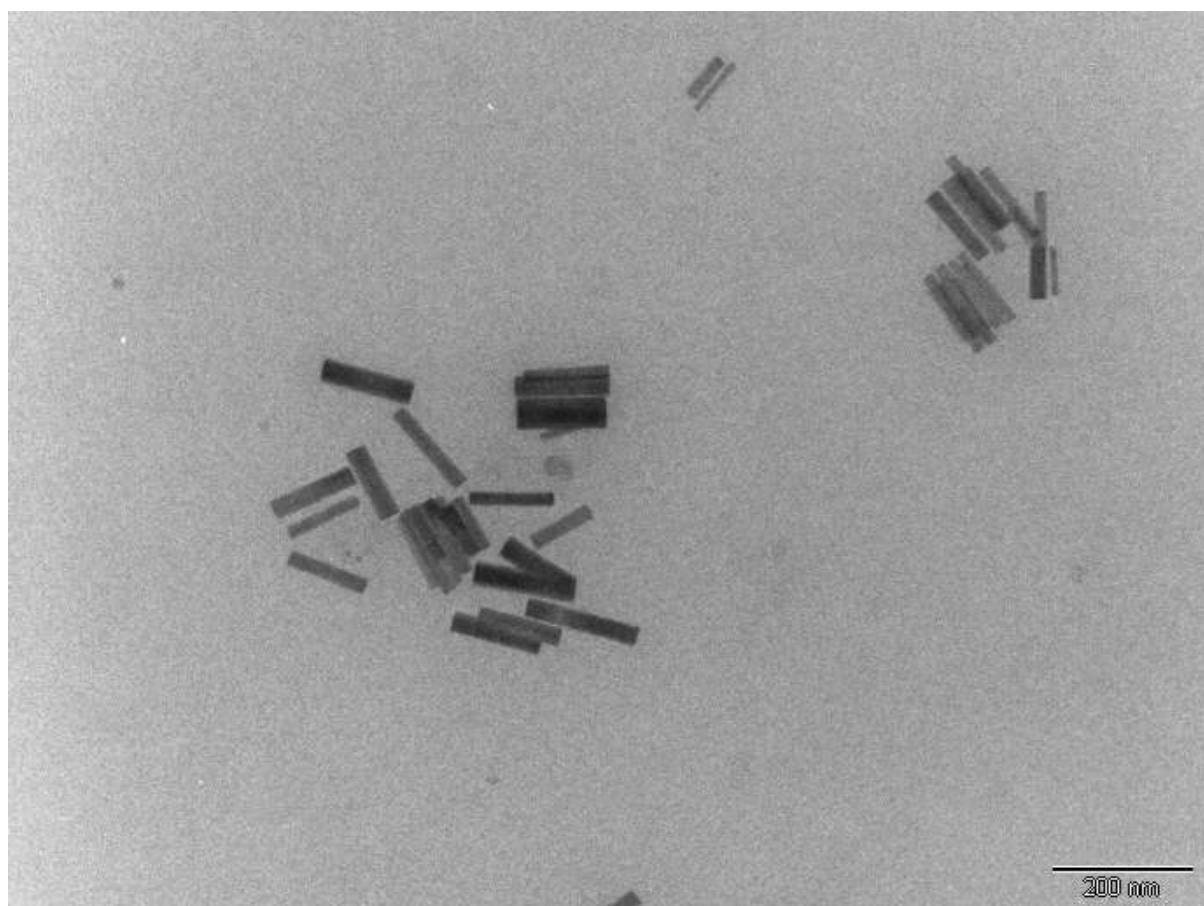

Supplement: c2dt30282a.pdf [file c2dt30282a.pdf]
